# Supplementary material
Source: PubMed Central journal article supplement (PMC5034113)
Supplement: cr201695x1.pdf [file cr201695x1.pdf]

A

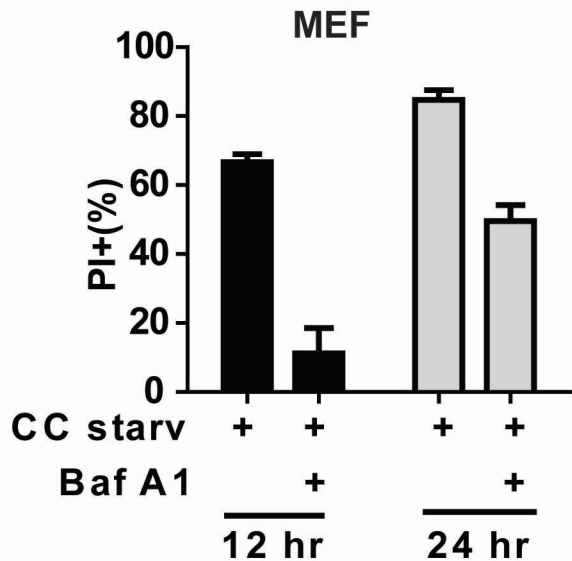

B

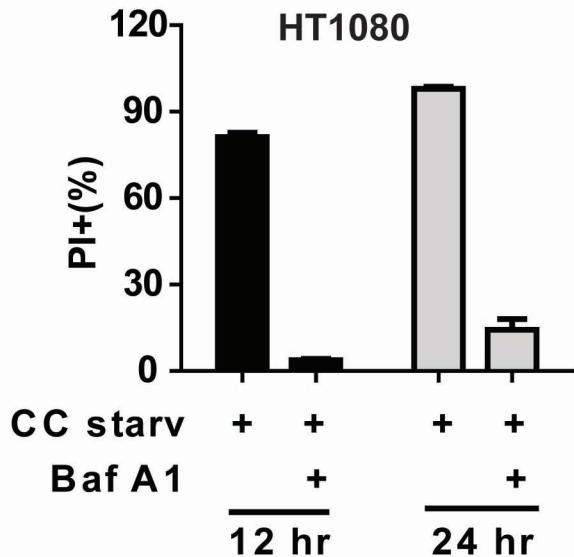

**Figure S1** Autophagy inhibitor BafA1 inhibits cystine starvation-induced ferroptosis in both MEFs and HT1080 cells.
