# Supplementary material
Source: PubMed Central journal article supplement (PMC5034113)
Supplement: cr201695x5.pdf [file cr201695x5.pdf]

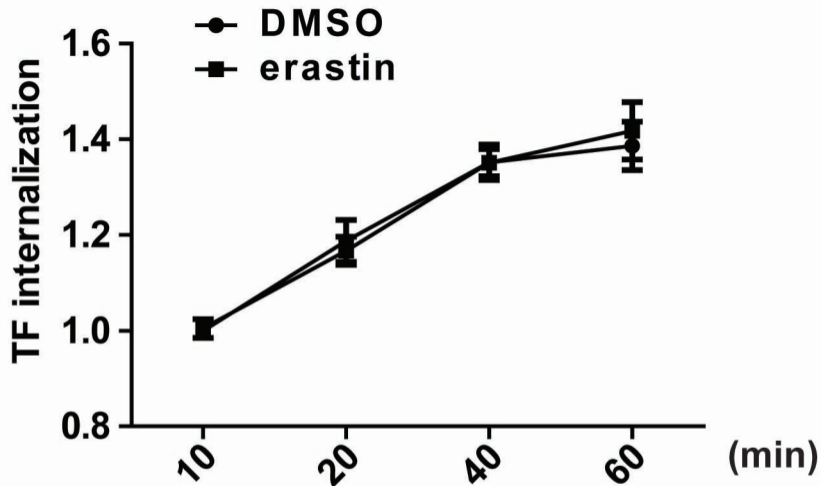

Gao et al Supplementary information, Figure S5

**Figure S5** Erastin does not alter transferrin internalization. MEFs were pretreated as indicated for 2 h and then incubated with 25  $\mu\text{g/ml}$  transferrin conjugated with Alexa Fluor 488. Transferrin internalization was measured by flow cytometry as detailed in Materials and Methods.
