# Supplementary material
Source: PubMed Central journal article supplement (PMC5034113)

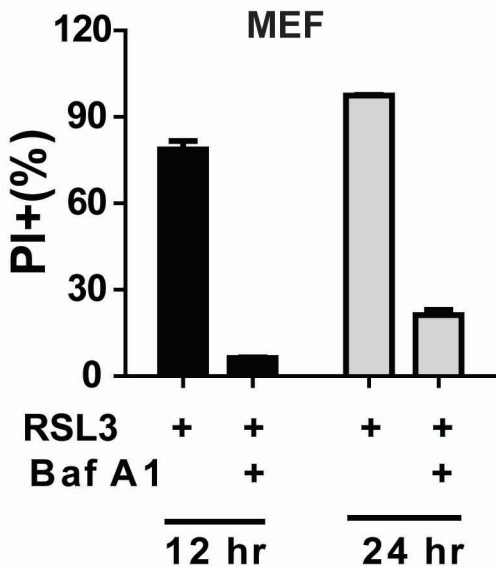

**Figure S4** Autophagy inhibitor BafA1 inhibits RSL3 starvation-induced ferroptosis in MEFs.

Supplement: cr201695x4.pdf [file cr201695x4.pdf]
